# Supplementary material for: Farmers’ Distress Index: An Approach for an Action Plan to Reduce Vulnerability in the Drylands of India
Source: MDPI journal article supplement (doi:10.3390/land10111236), 2021-11-12
Supplement: s1 [file s1]

# Supplementary Materials: Farmers' Distress Index: An Approach for an Action Plan to Reduce Vulnerability in the Drylands of India

**Table S1.** Rating of variables of Indicators.

| Dimension         | Sub-group                 | Indicator                                     | Association with FDI | Scores (0-2) |   |   |   |   |   | Total Score | Selected variables |
|-------------------|---------------------------|-----------------------------------------------|----------------------|--------------|---|---|---|---|---|-------------|--------------------|
|                   |                           |                                               |                      | A            | B | C | D | E | F |             |                    |
| Exposure to risk  | Exposure to risk          | Flood/ Cyclone (% of loss)                    | Positive             | 2            | 2 | 1 | 2 | 2 | 2 | 11          | √                  |
|                   |                           | Drought (% of loss)                           | Positive             | 2            | 2 | 1 | 2 | 2 | 2 | 11          | √                  |
|                   |                           | Pest/Disease attack (% of loss)               | Positive             | 1            | 1 | 1 | 1 | 1 | 1 | 6           |                    |
|                   |                           | Poor input (% of loss)                        | Positive             | 2            | 1 | 0 | 1 | 0 | 1 | 5           |                    |
|                   |                           | Less output price (% of loss)                 | Positive             | 2            | 2 | 1 | 2 | 2 | 2 | 11          | √                  |
|                   |                           | Livestock diseases (% of loss)                | Positive             | 1            | 1 | 1 | 1 | 1 | 1 | 6           |                    |
| Adoptive capacity | Socio-demographic Profile | Female headed households                      | Positive             | 2            | 2 | 2 | 0 | 1 | 1 | 8           |                    |
|                   |                           | Caste                                         | Inverse              | 2            | 2 | 2 | 1 | 1 | 2 | 10          | √                  |
|                   |                           | Religion                                      | Positive             | 2            | 2 | 1 | 0 | 0 | 0 | 5           |                    |
|                   |                           | HH size (no.)                                 | Positive             | 2            | 2 | 2 | 1 | 1 | 1 | 9           |                    |
|                   |                           | Elderly population                            | Positive             | 2            | 2 | 1 | 1 | 1 | 1 | 8           |                    |
|                   |                           | Disability                                    | Positive             | 2            | 1 | 1 | 0 | 0 | 0 | 4           |                    |
|                   |                           | Sex ratio(female/male)                        | Positive             | 2            | 2 | 2 | 2 | 2 | 2 | 12          | √                  |
|                   |                           | Educational status of head                    | Inverse              | 2            | 2 | 2 | 2 | 2 | 2 | 12          | √                  |
|                   |                           | Illiteracy                                    | Positive             | 2            | 1 | 1 | 1 | 2 | 2 | 9           |                    |
|                   |                           | Dependency ratio                              | Positive             | 2            | 2 | 1 | 1 | 2 | 2 | 10          | √                  |
|                   | Socio-Economic assets     | House value (₹)                               | Inverse              | 2            | 1 | 1 | 2 | 1 | 2 | 9           | √                  |
|                   |                           | Gold value (₹)                                | Inverse              | 2            | 0 | 0 | 1 | 1 | 2 | 6           |                    |
|                   |                           | Total own land (₹)                            | Inverse              | 2            | 1 | 1 | 2 | 2 | 2 | 10          | √                  |
|                   |                           | Total savings (₹)                             | Inverse              | 2            | 1 | 1 | 2 | 2 | 2 | 10          | √                  |
|                   | Livelihood strategies     | Total income (₹)                              | Inverse              | 2            | 1 | 1 | 0 | 1 | 2 | 7           |                    |
|                   |                           | Simpson Index Income                          | Inverse              | 2            | 0 | 1 | 2 | 2 | 2 | 9           | √                  |
|                   |                           | SDI of cropping pattern                       | Inverse              | 2            | 0 | 1 | 2 | 2 | 2 | 9           | √                  |
|                   |                           | Household expenditure (₹)                     | Positive             | 2            | 1 | 1 | 2 | 1 | 2 | 9           | √                  |
|                   | Social Network            | Membership of SHG (y/n)                       | Inverse              | 2            | 1 | 2 | 1 | 1 | 1 | 8           |                    |
|                   |                           | Membership of cooperatives (y/n)              | Inverse              | 2            | 1 | 2 | 1 | 1 | 1 | 8           |                    |
|                   |                           | Membership of agricultural cooperatives (y/n) | Inverse              | 2            | 1 | 2 | 1 | 1 | 1 | 8           |                    |
|                   |                           | Membership of local cooperatives (y/n)        | Inverse              | 2            | 1 | 2 | 1 | 1 | 1 | 8           |                    |
|                   |                           | All SHGs/Cooperatives                         | Inverse              | 2            | 1 | 2 | 2 | 1 | 1 | 9           | √                  |

|                                                  |                                          |                                                         |          |   |   |   |   |   |    |    |   |
|--------------------------------------------------|------------------------------------------|---------------------------------------------------------|----------|---|---|---|---|---|----|----|---|
| Agriculture                                      | Expenditure on agricultural input (₹/hh) | Positive                                                | 2        | 1 | 1 | 1 | 1 | 1 | 7  |    |   |
|                                                  | Income from agriculture (₹/hh)           | Inverse                                                 | 2        | 1 | 1 | 2 | 2 | 2 | 10 | √  |   |
|                                                  | Profit (₹/hh)                            | Inverse                                                 | 2        | 1 | 1 | 2 | 2 | 2 | 10 | √  |   |
|                                                  | Production cost (₹/hh)                   | Positive                                                | 2        | 1 | 1 | 1 | 1 | 1 | 7  |    |   |
|                                                  | Total owned land (acre)                  | Inverse                                                 | 2        | 2 | 1 | 1 | 1 | 1 | 8  |    |   |
|                                                  | Total leased in land(acre)               | Positive                                                | 2        | 2 | 1 | 0 | 0 | 0 | 5  |    |   |
|                                                  | Profit/Acre (Rs/acre)                    | Inverse                                                 | 2        | 1 | 1 | 1 | 1 | 1 | 7  |    |   |
|                                                  | Rainfed area (acre)                      | Positive                                                | 2        | 2 | 2 | 1 | 1 | 2 | 10 | √  |   |
| Sensitivity                                      | Water                                    | Provision of rain water harvesting in the village (y/n) | Inverse  | 2 | 2 | 1 | 1 | 1 | 1  | 8  |   |
|                                                  |                                          | Failure of Borewells (y/n)                              | Positive | 2 | 2 | 2 | 1 | 2 | 2  | 11 | √ |
|                                                  | Health                                   | Health Expenditure (₹)                                  | Positive | 2 | 1 | 1 | 2 | 1 | 2  | 9  | √ |
|                                                  |                                          | Likely Health Expenses (1-10)                           | Positive | 2 | 1 | 1 | 1 | 1 | 1  | 7  |   |
|                                                  |                                          | Chronic Illness (y/n)                                   | Positive | 2 | 1 | 1 | 1 | 1 | 1  | 7  |   |
|                                                  | Food                                     | Food expenses (₹)                                       | Positive | 2 | 1 | 1 | 1 | 2 | 2  | 9  | √ |
|                                                  | Infrastructure                           | Road (y/n)                                              | Inverse  | 2 | 2 | 2 | 2 | 2 | 2  | 12 | √ |
|                                                  | Children                                 | Children enrolled in private school (nos)               | Positive | 2 | 2 | 1 | 1 | 1 | 1  | 8  |   |
|                                                  |                                          | Likely to withdrawal of children from schools (1-10)    | Positive | 2 | 2 | 2 | 1 | 1 | 2  | 10 | √ |
|                                                  | Finance                                  | Indebtedness through informal source (₹)                | Positive | 2 | 2 | 2 | 2 | 2 | 2  | 12 | √ |
| Mitigation & adoption strategies and constraints | Farmers' initiative                      | Reduced cropped area (1-10)                             | Positive | 2 | 2 | 1 | 1 | 2 | 2  | 10 | √ |
|                                                  |                                          | Land kept fallow(1-10)                                  | Positive | 2 | 2 | 1 | 1 | 1 | 1  | 8  |   |
|                                                  |                                          | Low input use ((1-10)                                   | Positive | 2 | 2 | 1 | 1 | 1 | 1  | 8  |   |
|                                                  |                                          | Reduced household expenses (1-10)                       | Positive | 2 | 1 | 1 | 1 | 2 | 2  | 9  | √ |
|                                                  |                                          | Borrowing from relatives and friends (1-10)             | Positive | 2 | 2 | 1 | 1 | 1 | 1  | 8  |   |
|                                                  |                                          | Borrowing from money lenders (1-10)                     | Positive | 2 | 2 | 1 | 2 | 2 | 2  | 11 | √ |
|                                                  |                                          | Migrated out as casual labourer (1-10)                  | Positive | 2 | 1 | 2 | 1 | 1 | 1  | 8  |   |
|                                                  |                                          | Participation in MNREGA (1-10)                          | Positive | 2 | 2 | 1 | 1 | 1 | 0  | 7  |   |
|                                                  |                                          | Postponed health treatment (1-10)                       | Positive | 2 | 1 | 1 | 1 | 1 | 0  | 6  |   |
|                                                  |                                          | Postponed marriages (1-10)                              | Positive | 2 | 1 | 1 | 0 | 0 | 0  | 4  |   |
|                                                  |                                          | Sold livestock animals (1-10)                           | Positive | 2 | 1 | 1 | 1 | 2 | 2  | 9  | √ |
|                                                  |                                          | Engaged in animal husbandry (1-10)                      | Positive | 2 | 2 | 1 | 1 | 1 | 1  | 8  |   |
|                                                  |                                          | Sending women for domestic work (1-10)                  | Positive | 2 | 2 | 1 | 1 | 1 | 0  | 7  |   |

|                       |                                            |          |   |   |   |   |   |   |    |   |
|-----------------------|--------------------------------------------|----------|---|---|---|---|---|---|----|---|
| Govt. benefit         | Benefitted by any formal institution (y/n) | Inverse  | 2 | 2 | 2 | 2 | 2 | 2 | 12 | √ |
|                       | Benefitted through Rythu Bandhu (y/n)      | Inverse  | 2 | 1 | 2 | 1 | 1 | 2 | 9  | √ |
|                       | Benefitted through SHC(y/n)                | Inverse  | 2 | 1 | 1 | 1 | 1 | 1 | 7  |   |
|                       | Benefitted through KCC(y/n)                | Inverse  | 2 | 1 | 1 | 1 | 1 | 1 | 7  |   |
|                       | Benefitted through Old age pension(y/n)    | Inverse  | 2 | 1 | 2 | 1 | 1 | 2 | 9  | √ |
|                       | Benefitted through Health Scheme(y/n)      | Inverse  | 2 | 1 | 1 | 1 | 1 | 0 | 6  |   |
|                       | Got assistance for child education(y/n)    | Inverse  | 2 | 1 | 1 | 1 | 0 | 0 | 5  |   |
|                       | Benefitted through insurance scheme(y/n)   | Inverse  | 2 | 1 | 2 | 1 | 2 | 2 | 10 | √ |
|                       | Use own savings (1-10)                     | Inverse  | 2 | 1 | 1 | 1 | 1 | 1 | 7  |   |
| Adaptation strategies | Migrated to other places (1-10)            | Inverse  | 2 | 2 | 2 | 1 | 2 | 2 | 11 | √ |
|                       | Change cropping pattern (1-10)             | Inverse  | 2 | 1 | 1 | 1 | 1 | 1 | 7  |   |
|                       | Sale of assets (1-10)                      | Inverse  | 2 | 1 | 1 | 1 | 1 | 1 | 7  |   |
|                       | Reduce expenditure on food (1-10)          | Inverse  | 2 | 1 | 1 | 1 | 1 | 1 | 7  |   |
|                       | Drop out the children from school (1-10)   | Inverse  | 2 | 1 | 1 | 0 | 1 | 1 | 6  |   |
|                       | Borrowing (1-10)                           | Inverse  | 2 | 1 | 2 | 1 | 1 | 1 | 8  |   |
|                       | Depend more on non-farm employment (1-10)  | Inverse  | 2 | 2 | 1 | 1 | 2 | 2 | 10 | √ |
|                       | Bonded labour (1-10)                       | Inverse  | 2 | 0 | 0 | 1 | 1 | 1 | 5  |   |
|                       | Take support from local governments (1-10) | Inverse  | 2 | 1 | 1 | 0 | 1 | 1 | 6  |   |
|                       | Low education level (1-10)                 | Inverse  | 2 | 2 | 2 | 1 | 2 | 2 | 11 | √ |
| Constraints           | Lack of access to information (1-10)       | Inverse  | 2 | 1 | 1 | 1 | 1 | 1 | 7  |   |
|                       | Inadequate capital (1-10)                  | Inverse  | 2 | 1 | 2 | 1 | 2 | 2 | 10 | √ |
|                       | Lack of extension services (1-10)          | Inverse  | 2 | 1 | 1 | 1 | 1 | 1 | 7  |   |
|                       | Land not suitable (1-10)                   | Inverse  | 2 | 1 | 1 | 1 | 1 | 1 | 7  |   |
|                       | Lack of irrigation (1-10)                  | Inverse  | 2 | 1 | 2 | 2 | 2 | 2 | 11 | √ |
|                       | Non-availability of labour (1-10)          | Inverse  | 2 | 1 | 1 | 1 | 1 | 1 | 7  |   |
|                       | Lack of quality inputs (1-10)              | Inverse  | 2 | 1 | 1 | 1 | 1 | 1 | 7  |   |
|                       | Health expenses (1-10 scale)               | Positive | 2 | 1 | 1 | 1 | 1 | 1 | 7  |   |
| Triggers              | Marital disputes (1-10 scale)              | Positive | 2 | 1 | 1 | 0 | 1 | 1 | 6  |   |
|                       | Chronical illness (1-10 scale)             | Positive | 2 | 1 | 1 | 1 | 2 | 2 | 9  | √ |

|                                |                                           |                                                                    |          |   |   |   |   |   |   |    |   |
|--------------------------------|-------------------------------------------|--------------------------------------------------------------------|----------|---|---|---|---|---|---|----|---|
|                                |                                           | Children marriage dowry (y/n)                                      | Positive | 2 | 1 | 1 | 2 | 1 | 2 | 9  | √ |
|                                |                                           | Educational expense (1-10 scale)                                   | Positive | 2 | 1 | 1 | 1 | 1 | 1 | 7  |   |
|                                |                                           | Other marriage expense (1-10 scale)                                | Positive | 2 | 0 | 0 | 1 | 0 | 1 | 4  |   |
|                                |                                           | Unemployment (1-10 scale)                                          | Positive | 2 | 1 | 2 | 1 | 1 | 2 | 9  | √ |
|                                |                                           | Lack of alternative income source (1-10 scale)                     | Positive | 2 | 1 | 1 | 1 | 1 | 1 | 7  |   |
|                                |                                           | Frequent pest and disease attack (1-10 scale)                      | Positive | 2 | 1 | 1 | 1 | 1 | 1 | 7  |   |
|                                |                                           | Outbreak of livestock disease (1-10 scale)                         | Positive | 2 | 1 | 1 | 1 | 1 | 1 | 7  |   |
|                                |                                           | High farm expenses (1-10 scale)                                    | Positive | 2 | 1 | 1 | 1 | 1 | 2 | 8  |   |
|                                |                                           | Crop failure (1-10 scale)                                          | Positive | 2 | 2 | 2 | 2 | 2 | 2 | 12 | √ |
|                                |                                           | Debt from informal sources (Rs.)                                   | Positive | 2 | 1 | 2 | 1 | 1 | 1 | 8  |   |
| Social & Psychological factors | Social factor & Change in social position | Objection in women participation (y/n)                             | Positive | 2 | 1 | 1 | 1 | 1 | 1 | 7  | √ |
|                                |                                           | Catastrophe incident in last 5 years (y/n)                         | Positive | 2 | 1 | 1 | 1 | 1 | 1 | 7  |   |
|                                |                                           | Negative comment from society (y/n)                                | Positive | 2 | 1 | 1 | 0 | 1 | 0 | 5  |   |
|                                |                                           | Feeling isolated (y/n)                                             | Positive | 2 | 1 | 1 | 2 | 2 | 2 | 10 | √ |
|                                |                                           | Serious issue with society (y/n)                                   | Positive | 2 | 1 | 1 | 1 | 1 | 1 | 7  |   |
|                                | Family burden                             | Unable to fulfil family's responsibility(y/n)                      | Positive | 2 | 1 | 1 | 1 | 2 | 2 | 9  | √ |
|                                |                                           | Didn't get moral support(y/n)                                      | Positive | 2 | 1 | 1 | 1 | 1 | 1 | 7  |   |
|                                |                                           | Major family issue(y/n)                                            | Positive | 2 | 1 | 1 | 1 | 1 | 1 | 7  |   |
|                                | Deterioration of economic status          | Worried about financial distress(y/n)                              | Positive | 2 | 1 | 1 | 1 | 2 | 2 | 9  | √ |
|                                |                                           | Family problem regarding the deterioration in economic status(y/n) | Positive | 2 | 1 | 1 | 1 | 1 | 2 | 8  |   |
|                                | Behavioural change                        | addiction on smoking or alcohol or drugs(y/n)                      | Positive | 2 | 1 | 1 | 2 | 1 | 2 | 9  | √ |
|                                | Loosing of self confidence                | Stressed out for a long time(y/n)                                  | Positive | 2 | 1 | 1 | 1 | 2 | 2 | 9  | √ |
|                                |                                           | Lost pleasure in economic activities(y/n)                          | Positive | 2 | 0 | 0 | 1 | 1 | 1 | 5  |   |
|                                |                                           | Thought of ending life (y/n)                                       | Positive | 2 | 0 | 0 | 1 | 2 | 2 | 7  |   |
| Impacts                        | Impact                                    | Reduced income (1-10)                                              | Positive | 2 | 1 | 1 | 2 | 2 | 2 | 10 | √ |
|                                |                                           | Increase indebtedness (1-10)                                       | Positive | 2 | 1 | 1 | 2 | 2 | 2 | 10 | √ |

|                                     |          |   |   |   |   |   |   |    |   |
|-------------------------------------|----------|---|---|---|---|---|---|----|---|
| Shortage in food consumption (1-10) | Positive | 2 | 1 | 1 | 1 | 2 | 1 | 8  |   |
| Purchased food from outside (1-10)  | Positive | 2 | 1 | 1 | 1 | 1 | 1 | 7  |   |
| Increased poverty (1-10)            | Positive | 2 | 1 | 1 | 2 | 2 | 2 | 10 | √ |
| Deteriorating health (1-10)         | Positive | 2 | 1 | 1 | 1 | 1 | 1 | 7  |   |
| Social stigma (1-10)                | Positive | 2 | 1 | 1 | 1 | 0 | 1 | 6  |   |
| Sale of livestock/poultry(y/n)      | Positive | 2 | 1 | 1 | 1 | 1 | 1 | 7  |   |
| Face distress in last 5 years(y/n)  | Positive | 2 | 2 | 2 | 2 | 2 | 2 | 12 | √ |

**Table S2.** Indices of crop loss during last 5 years due to natural hazards (Exposure to risk).

| District   | Flood/ Cycle | Drought | Pest attack | Poor inputs | Low output price | Livestock diseases | Other losses |
|------------|--------------|---------|-------------|-------------|------------------|--------------------|--------------|
| Ananthapur | 0.321        | 0.335   | 0.042       | 0.009       | 0.000            | 0.000              | 0.432        |
| Kurnool    | 0.186        | 0.421   | 0.095       | 0.001       | 0.000            | 0.016              | 0.418        |
| Nalgonda   | 0.256        | 0.288   | 0.061       | 0.000       | 0.000            | 0.000              | 0.366        |
| Siddipet   | 0.143        | 0.300   | 0.118       | 0.004       | 0.012            | 0.015              | 0.326        |

**Table S3.** Indices of Socio-demographic profile.

| District   | Sex  | Caste | Religion | Family size | Elderly population | Disability | Sex ratio | Educational status of head | Illiteracy | Dependency ratio | Mean  |
|------------|------|-------|----------|-------------|--------------------|------------|-----------|----------------------------|------------|------------------|-------|
| Ananthapur | 0.07 | 0.61  | 0.01     | 0.34        | 0.45               | 0.42       | 0.17      | 0.8                        | 0.32       | 0.27             | 0.346 |
| KurNool    | 0.08 | 0.60  | 0.05     | 0.37        | 0.53               | 0.48       | 0.17      | 0.78                       | 0.36       | 0.28             | 0.370 |
| Nalgonda   | 0.07 | 0.71  | 0.01     | 0.33        | 0.6                | 0.57       | 0.16      | 0.8                        | 0.33       | 0.24             | 0.382 |
| Siddipet   | 0.09 | 0.59  | 0.05     | 0.37        | 0.58               | 0.53       | 0.19      | 0.76                       | 0.38       | 0.28             | 0.382 |
| Total      | 0.08 | 0.63  | 0.03     | 0.35        | 0.54               | 0.5        | 0.17      | 0.79                       | 0.35       | 0.27             | 0.371 |

**Table S4.** Indices of socioeconomic assets.

|                | Ananthapur | Kurnool | Nalgonda | Siddipet |
|----------------|------------|---------|----------|----------|
| House value    | 0.99       | 0.97    | 0.96     | 0.94     |
| Gold value     | 0.92       | 0.91    | 0.92     | 0.91     |
| Total own land | 0.71       | 0.79    | 0.82     | 0.88     |
| Mean           | 0.81       | 0.82    | 0.83     | 0.84     |

**Table S5.** Indices of livelihood strategies.

|                       | Ananthapur | KurNool | Nalgonda | Siddipet |
|-----------------------|------------|---------|----------|----------|
| Total savings         | 0.810      | 0.822   | 0.837    | 0.770    |
| Total income          | 0.910      | 0.880   | 0.890    | 0.866    |
| Simpson Index Income  | 0.527      | 0.482   | 0.516    | 0.515    |
| SDI                   | 0.191      | 0.227   | 0.117    | 0.328    |
| Household expenditure | 0.392      | 0.381   | 0.369    | 0.359    |
| Mean                  | 0.566      | 0.558   | 0.546    | 0.568    |

**Table S6.** Indices of Social networks.

|                          | Ananthapur | Kurnool | Nalgonda | Siddipet |
|--------------------------|------------|---------|----------|----------|
| SHG                      | 0.081      | 0.194   | 0.212    | 0.131    |
| Cooperative              | 0.862      | 0.856   | 0.931    | 0.800    |
| Agricultural Cooperative | 0.919      | 0.944   | 0.975    | 0.969    |
| Local cooperative        | 0.981      | 0.987   | 0.987    | 0.956    |
| Mean                     | 0.711      | 0.745   | 0.776    | 0.714    |

Table S7. Indices of Agricultural activities.

|                         | Ananthapur | Kurnool | Nalgonda | Siddipet |
|-------------------------|------------|---------|----------|----------|
| Agricultural input      | 0.122      | 0.104   | 0.082    | 0.063    |
| Income from agriculture | 0.856      | 0.791   | 0.857    | 0.818    |
| Profit                  | 0.703      | 0.701   | 0.694    | 0.682    |
| Production cost         | 0.065      | 0.135   | 0.150    | 0.090    |
| Total owned land        | 0.713      | 0.793   | 0.819    | 0.881    |
| Total leased in land    | 0.002      | 0.044   | 0.025    | 0.015    |
| Profit/Acre             | 0.637      | 0.638   | 0.622    | 0.580    |
| Rainfed operational     | 0.153      | 0.160   | 0.120    | 0.046    |
| Mean                    | 0.406      | 0.421   | 0.421    | 0.397    |

Table S8. Indices of Sensitivity indicators.

|                |                                               | Ananthapur | Kurnool | Nalgonda | Siddipet |
|----------------|-----------------------------------------------|------------|---------|----------|----------|
| Water          | Provision of rain water harvesting            | 0.41       | 0.68    | 0.59     | 0.50     |
|                | Failure of Borewells                          | 0.78       | 0.68    | 0.90     | 0.72     |
| Health         | Health Expenditure                            | 0.03       | 0.04    | 0.04     | 0.05     |
|                | Likely Health Expenses                        | 0.39       | 0.43    | 0.51     | 0.47     |
|                | Chronic Illness                               | 0.04       | 0.13    | 0.09     | 0.12     |
| Food           | Food expenses                                 | 0.00       | 0.28    | 0.27     | 0.28     |
| Infrastructure | Road                                          | 0.00       | 0.04    | 0.02     | 0.00     |
| Children       | Children enrolled in private school           | 0.13       | 0.14    | 0.19     | 0.23     |
|                | Likely to withdrawal of children from schools | 0.36       | 0.47    | 0.45     | 0.47     |
| Financial      | Indebtedness through informal source          | 0.03       | 0.05    | 0.03     | 0.04     |
|                | Mean                                          | 0.217      | 0.294   | 0.309    | 0.288    |

Table S9. Indices of farmers' own initiative towards mitigation strategies.

|                                      | Ananthapur | Kurnool | Nalgonda | Siddipet |
|--------------------------------------|------------|---------|----------|----------|
| Reduced cropped area                 | 0.122      | 0.104   | 0.082    | 0.063    |
| Land kept fallow                     | 0.144      | 0.209   | 0.143    | 0.182    |
| Low input use                        | 0.297      | 0.299   | 0.306    | 0.318    |
| Reduced household expenses           | 0.065      | 0.135   | 0.150    | 0.090    |
| Borrowing from relatives and friends | 0.287      | 0.207   | 0.181    | 0.119    |
| Borrowing from money lenders         | 0.002      | 0.044   | 0.025    | 0.015    |
| Migrated out as casual labourer      | 0.363      | 0.362   | 0.378    | 0.420    |
| Participation in MNREGA              | 0.144      | 0.209   | 0.143    | 0.182    |
| Postponed health treatment           | 0.297      | 0.299   | 0.306    | 0.318    |
| Postponed marriages                  | 0.065      | 0.135   | 0.150    | 0.090    |
| Sold livestock animals               | 0.287      | 0.207   | 0.181    | 0.119    |
| Engaged in animal husbandry          | 0.002      | 0.044   | 0.025    | 0.015    |
| Sending women for domestic work      | 0.363      | 0.362   | 0.378    | 0.420    |

|      |       |       |       |       |
|------|-------|-------|-------|-------|
| Mean | 0.188 | 0.201 | 0.188 | 0.181 |
|------|-------|-------|-------|-------|

**Table S10.** Indices of Government support.

|                                      | Ananthapur | Kurnool | Nalgonda | Siddipet |
|--------------------------------------|------------|---------|----------|----------|
| Benefitted by any formal institution | 0.08       | 0.08    | 0.03     | 0.16     |
| Benefitted through Rythu Bandhu      | 0.09       | 0.15    | 0.04     | 0.07     |
| Benefitted through SHC               | 0.96       | 0.87    | 0.90     | 0.96     |
| Benefitted through KCC               | 0.96       | 0.98    | 0.99     | 0.99     |
| Benefitted through Old age pension   | 0.64       | 0.78    | 0.88     | 0.80     |
| Benefitted through Health Scheme     | 0.92       | 0.96    | 0.96     | 0.96     |
| Got assistance for child education   | 0.94       | 0.73    | 0.94     | 0.90     |
| Benefitted through insurance scheme  | 0.85       | 0.76    | 0.94     | 0.91     |
| Mean                                 | 0.680      | 0.664   | 0.710    | 0.719    |

**Table S11.** Indices of adaptation strategies to reduce the distress.

|                                    | Ananthapur | Kurnool | Nalgonda | Siddipet |
|------------------------------------|------------|---------|----------|----------|
| Use own savings                    | 0.491      | 0.494   | 0.475    | 0.512    |
| Migrated to other places           | 0.345      | 0.320   | 0.211    | 0.259    |
| Change cropping pattern            | 0.295      | 0.417   | 0.302    | 0.375    |
| Sale of assets                     | 0.244      | 0.344   | 0.253    | 0.305    |
| Reduce expenditure on food         | 0.402      | 0.427   | 0.364    | 0.408    |
| Drop out the children from school  | 0.209      | 0.287   | 0.180    | 0.247    |
| Borrowing                          | 0.694      | 0.691   | 0.664    | 0.708    |
| Depend more on non-farm employment | 0.614      | 0.673   | 0.641    | 0.680    |
| Bonded labour                      | 0.350      | 0.383   | 0.325    | 0.395    |
| Take support from local govt.      | 0.320      | 0.470   | 0.452    | 0.448    |
| Mean                               | 0.396      | 0.451   | 0.387    | 0.434    |

**Table S12.** Indices of the constraints in adaptation measures.

|                               | Ananthapur | Kurnool | Nalgonda | Siddipet |
|-------------------------------|------------|---------|----------|----------|
| Low education level           | 0.400      | 0.466   | 0.541    | 0.547    |
| Lack of access to information | 0.388      | 0.519   | 0.484    | 0.519    |
| Inadequate capital            | 0.725      | 0.609   | 0.659    | 0.606    |
| Lack of extension services    | 0.475      | 0.359   | 0.347    | 0.306    |
| Land not suitable             | 0.647      | 0.512   | 0.500    | 0.466    |
| Lack of irrigation            | 0.850      | 0.709   | 0.719    | 0.637    |
| Non-availability of labour    | 0.500      | 0.406   | 0.422    | 0.338    |
| Lack of quality inputs        | 0.563      | 0.350   | 0.381    | 0.312    |
| Mean                          | 0.569      | 0.491   | 0.507    | 0.466    |

**Table S13.** Indices of Triggers.

|                         | Ananthapur | Kurnool | Nalgonda | Siddipet |
|-------------------------|------------|---------|----------|----------|
| Health expenses         | 0.386      | 0.434   | 0.513    | 0.474    |
| Marital disputes        | 0.030      | 0.070   | 0.110    | 0.070    |
| Chronical illness       | 0.040      | 0.130   | 0.090    | 0.120    |
| Children marriage dowry | 0.008      | 0.016   | 0.015    | 0.025    |
| Educational expense     | 0.450      | 0.462   | 0.488    | 0.476    |
| Other marriage expense  | 0.447      | 0.449   | 0.495    | 0.463    |
| Unemployment            | 0.569      | 0.594   | 0.615    | 0.588    |

|                                   |       |       |       |       |
|-----------------------------------|-------|-------|-------|-------|
| Lack of alternative income source | 0.647 | 0.672 | 0.664 | 0.658 |
| Frequent pest and disease attack  | 0.632 | 0.636 | 0.606 | 0.576 |
| Outbreak of livestock disease     | 0.413 | 0.441 | 0.437 | 0.375 |
| Lower price of output             | 0.610 | 0.618 | 0.685 | 0.611 |
| High farm expenses                | 0.692 | 0.688 | 0.747 | 0.685 |
| Crop failure                      | 0.738 | 0.709 | 0.734 | 0.700 |
| Debt from informal sources        | 0.030 | 0.049 | 0.032 | 0.044 |
| Mean                              | 0.407 | 0.426 | 0.445 | 0.419 |

**Table S14.** Indices of social and psychological factors causes agrarian distress.

|                                  |                                                              | Ananthapur | Kurnool | Nalgonda | Siddipet |
|----------------------------------|--------------------------------------------------------------|------------|---------|----------|----------|
| Social issues                    | Objection in women participation                             | 0.00       | 0.22    | 0.05     | 0.13     |
|                                  | Catastrophe incident in last 5 years                         | 0.01       | 0.03    | 0.03     | 0.01     |
|                                  | Negative comment from society                                | 0.00       | 0.11    | 0.03     | 0.09     |
| Change in social position        | Feeling isolated                                             | 0.04       | 0.20    | 0.08     | 0.16     |
| Mental harassment                | Serious issue with society                                   | 0.16       | 0.15    | 0.04     | 0.11     |
| Family burden                    | Unable to fulfil family's responsibility                     | 0.52       | 0.55    | 0.14     | 0.33     |
|                                  | Did not get moral support                                    | 0.05       | 0.26    | 0.08     | 0.19     |
|                                  | Major family issue                                           | 0.04       | 0.13    | 0.08     | 0.17     |
| Deterioration of economic status | Worried about financial distress                             | 0.00       | 0.00    | 0.14     | 0.51     |
|                                  | Family issues regarding the deterioration in economic status | 0.12       | 0.26    | 0.07     | 0.18     |
| Behavioural change               | addiction on smoking or alcohol or drugs                     | 0.29       | 0.39    | 0.49     | 0.35     |
| Loosing of self confidence       | Stressed out for a long time                                 | 0.18       | 0.18    | 0.08     | 0.24     |
|                                  | Lost pleasure in economic activities                         | 0.13       | 0.09    | 0.08     | 0.14     |
|                                  | Thought of ending life                                       | 0.00       | 0.05    | 0.03     | 0.01     |
|                                  | Mean                                                         | 0.11       | 0.110   | 0.187    | 0.101    |

**Table S15.** Indices of the impact of agrarian distress on farmer's livelihood.

|                               | Ananthapur | Kurnool | Nalgonda | Siddipet |
|-------------------------------|------------|---------|----------|----------|
| Reduced income                | 0.722      | 0.731   | 0.768    | 0.739    |
| Increase indebtedness         | 0.735      | 0.752   | 0.773    | 0.749    |
| Shortage in food consumption  | 0.506      | 0.571   | 0.569    | 0.542    |
| Purchased food from outside   | 0.492      | 0.538   | 0.513    | 0.516    |
| Increased poverty             | 0.682      | 0.686   | 0.638    | 0.642    |
| Deteriorating health          | 0.440      | 0.506   | 0.520    | 0.488    |
| Social stigma                 | 0.296      | 0.341   | 0.341    | 0.307    |
| Sale of livestock/poultry     | 0.020      | 0.080   | 0.040    | 0.110    |
| Face distress in last 5 years | 0.000      | 0.030   | 0.530    | 0.870    |
| Mean                          | 0.433      | 0.471   | 0.521    | 0.552    |
